# Supplementary material
Source: PubMed Central journal article supplement (PMC5462120)
Supplement: NIHMS861021-supplement-2.pdf [file NIHMS861021-supplement-2.pdf]

## Supplementary Table 1: Examples of reports of most recent dreaming experiences

| Stage | Time of night | Report                                                                                                                                                                                                                                  |
|-------|---------------|-----------------------------------------------------------------------------------------------------------------------------------------------------------------------------------------------------------------------------------------|
| N2    | 1:44 am       | I was daydreaming. I was holding a musket, like a rifle, and I was skipping through images with it. Last image was a piece of pie, I am not sure but I think it was.                                                                    |
| N2    | 5:23 am       | I was thinking about perfume and fragrance. The very last word was 'fragrance'.                                                                                                                                                         |
| N2    | 5:55 am       | The image of a Buddha belly, a bare belly.                                                                                                                                                                                              |
| N2    | 6:51 am       | I saw a person waiting in a car. Maybe it was me.                                                                                                                                                                                       |
| N3    | 1:26 am       | I was seeing geometric shapes that were moving very fast.                                                                                                                                                                               |
| N3    | 5:18 am       | I was trying to tell the difference between a homemade and a store---bought basket or tray of pastry.                                                                                                                                   |
| N3    | 6:09 am       | The last thing was raspberries, a pint of raspberries.                                                                                                                                                                                  |
| REM   | 3:28 am       | I was doing this experiment with another girl. I asked her what time it was and she said 7:07. No, she actually said 6:55. Her boyfriend was in the room, too. The last scene was just her face. It was quite a long dream before that. |
| REM   | 3:59 am       | I saw my brother eating hair on a plate.                                                                                                                                                                                                |
| REM   | 6:05 am       | It was the end of a movie. I was getting out on the street through a door. At that moment I hear the noise of the alarm sound and woke up.                                                                                              |
| REM   | 6:36 am       | In the last scene I was riding a bicycle in a street in B. Before that I was talking to someone in a court. Somebody taking care of the court. He gave lots of explanations about flowers.                                              |

**Supplementary table 2: Proportion of dreaming experiences in NREM and REM sleep**

| <b>Experiment 1 (NREM analysis, n=32, 1 night per subject)</b> |           |           |           |            |
|----------------------------------------------------------------|-----------|-----------|-----------|------------|
|                                                                | DE        | DEWR      | NE        | Total      |
| NREM (N2)                                                      | 97 (42%)  | 44 (19%)  | 92 (39%)  | 233 (100%) |
| <b>Experiment 1 (REM analysis, n=6, 1 night per subject) *</b> |           |           |           |            |
|                                                                | DE        | DEWR      | NE        | Total      |
| REM                                                            | 12 (55%)  | 0 (0%)    | 10 (45%)  | 22 (100%)  |
| <b>Experiment 2 (n=7, 5-10 nights per subject)</b>             |           |           |           |            |
|                                                                | DE        | DEWR      | NE        | Total      |
| NREM (N2 & N3)                                                 | 193 (33%) | 225 (38%) | 168 (29%) | 586 (100%) |
| REM                                                            | 131 (77%) | 31 (18%)  | 8 (5%)    | 170 (100%) |

\* The proportion of DE and NE in Experiment 1 reflects the criterion of only including subjects that had both DE and NE during the night.

**Supplementary table 3: Prediction accuracy of DE and NE in sleep**

| Participant | DE ACC | NE ACC | N awakenings | 0.5---4.5Hz thresh | 18---25 Hz thresh |
|-------------|--------|--------|--------------|--------------------|-------------------|
| 1           | 0.89   | 0.75   | 14           | [30.0 217.0]       | [0.25 0.40]       |
| 2           | 0.89   | 0.75   | 13           | [30.0 165.0]       | [0.11 0.22]       |
| 3           | 1.0    | 1.0    | 8            | [32.0 188.0]       | [0.09 0.30]       |
| 4           | 1.0    | 0.71   | 16           | [42.9 153.2]       | [0.19 0.43]       |
| 5           | 0.89   | 0.86   | 16           | [15.0 94.0]        | [0.08 0.20]       |
| 6           | 0.78   | 1.0    | 10           | [14.8 63.0]        | [0.06 0.11]       |
| 7           | 1.0    | 1.0    | 7            | [19.0 154.0]       | [0.09 0.28]       |

**Supplementary table 4. High/Low frequency power ratio DE > NE**

| Region                     | Volume<br>(kE) | Peak<br>t-value | Peak MNI |      |      |
|----------------------------|----------------|-----------------|----------|------|------|
|                            |                |                 | X        | Y    | Z    |
| R precuneus/cuneus/SPL/SOC | 2920           | 11.84           | 19       | --63 | 58   |
| L precuneus/cuneus/STS/SOC | 1056           | 11.09           | --7      | --79 | 51   |
| R MFG                      | 309            | 10.78           | 37       | 50   | --6  |
| R lingual gyrus            | 158            | 9.39            | 20       | --57 | --13 |
| R precentral gyrus         | 153            | 9.08            | 42       | --8  | 65   |
| L IFG                      | 162            | 7.98            | --53     | 24   | --6  |

\* All clusters significant at  $p < 0.001$ , FDR cluster corrected.

R: right; L: left; SPL: superior parietal lobule; STS: superior temporal sulcus;

SOC: superior occipital cortex; MFG: Middle frontal gyrus; IFG: inferior frontal gyrus

**Supplementary table 5: lateralization indices**

| Contrast          | Stage/Freq. | Experiment         | Lateralization index | ANOVA Hemisphere x Report |           |
|-------------------|-------------|--------------------|----------------------|---------------------------|-----------|
| <b>DE vs NE</b>   | NREM/LF     | Exp 1<br>(n=32)    | 0.06 <sub>(L)</sub>  | $F_{(1,31)}=0.699$        | $p=0.410$ |
|                   |             | Exp 2<br>(n=7)     | 0.55 <sub>(L)</sub>  | $F_{(1,6)}=1.127$         | $p=0.329$ |
|                   | NREM/HF     | Exp 1<br>(n=32)    | 0.01 <sub>(L)</sub>  | $F_{(1,31)}=0.002$        | $p=0.961$ |
|                   |             | Exp 2<br>(n=7)     | -0.28 <sub>(R)</sub> | $F_{(1,6)}=0.822$         | $p=0.399$ |
| <b>DEWR vs NE</b> | NREM/LF     | Exp 1<br>(n=20)    | 0.40 <sub>(L)</sub>  | $F_{(1,19)}=0.902$        | $p=0.354$ |
| <b>DE vs DEWR</b> | NREM/HF     | Exp 1<br>(n=20)    | -0.18 <sub>(R)</sub> | $F_{(1,19)}=0.210$        | $p=0.652$ |
| <b>DE vs NE</b>   | REM/LF      | Exp 1+2<br>(n=10)  | 0.37 <sub>(L)</sub>  | $F_{(1,9)}=2.727$         | $p=0.133$ |
|                   | REM/HF      | Exp E1+2<br>(n=10) | -0.25 <sub>(R)</sub> | $F_{(1,9)}=5.334$         | $p=0.046$ |

Lateralization of findings. For each contrast, the brain hemisphere including the relative majority of activated voxels was identified (Lateralization Index, LI)<sup>67</sup> and repeated measure ANOVA was performed to evaluate the possible interaction between hemisphere and type of report.
